# Supplementary material for: Cryptotanshinone Ameliorates Radiation-Induced Lung Injury in Rats
Source: Hindawi journal article supplement (doi:10.1155/2019/1908416), 2019-02-20
Supplement: f1 [file 1908416.f1.pdf]

## **A description for supplementary files**

- 1) Page 1: Weight. Raw data for Fig. 1.
- 2) Page 2-4: Pulmonary Function. Raw data for Fig. 2.
- 3) Page 5-7: H&E and Masson Score, and Pulmonary coefficients. Raw data for Fig. 3.
- 4) Page 8-12:  $\alpha$ -SMA and HYP. Raw data for Fig. 4.
- 5) Page 13-18: TGF- $\beta$ 1 and CTGF. Raw data for Fig. 5.
- 6) Page 19-20: NOX-4 and COX-2. Raw data for Fig. 6.
- 7) Page 21: MMP-1. Raw data for Fig. 7.
- 8) Page 22-29: IL-6 and IL-10. Raw data for Fig. 8.
- 9) Page 30-31: CCL3 and CCR1. Raw data for Fig. 9.

| Body Weight (g) |                 |                   |     |     |     |     |     |     |     |     |
|-----------------|-----------------|-------------------|-----|-----|-----|-----|-----|-----|-----|-----|
| Group           | Sign            | Time (month)      |     |     |     |     |     |     |     |     |
|                 |                 | Before medication | 1   | 2   | 3   | 4   | 5   | 6   | 7   | 8   |
| Normal          | left ear        | 198               | 222 | 298 | 346 | 379 | 418 | 458 | 492 | 523 |
|                 | right ear       | 201               | 253 | 326 | 355 | 392 | 449 | 457 | 472 | 494 |
|                 | left eye        | 205               | 252 | 319 | 363 | 411 | 462 | 486 | 516 | 533 |
|                 | right eye       | 219               | 268 | 314 | 337 | 378 | 421 | 452 | 483 | 517 |
|                 | left front paw  | 196               | 246 | 295 | 334 | 384 | 439 | 458 | 464 | 471 |
|                 | right front paw | 202               | 299 | 347 | 389 | 414 | 459 | 472 | 480 | 496 |
| RT              | left ear        | 200               | 235 | 247 | 258 | 269 | 286 | 309 | 316 | 334 |
|                 | right ear       | 207               | 265 | 295 | 308 | 324 | 347 | 362 | 399 | 410 |
|                 | left eye        | 216               | 278 | 343 | 357 | 365 | 382 | 409 | 422 | 439 |
|                 | right eye       | 188               | 202 | 225 | 239 | 252 | 265 | 289 | 302 | 327 |
|                 | left front paw  | 220               | 225 | 279 | 282 | 295 | 317 | 330 | 352 | 385 |
|                 | right front paw | 213               | 245 | 289 | 315 | 332 | 348 | 357 | 381 | 409 |
| RT+PND          | left ear        | 210               | 261 | 323 | 374 | 398 | 418 | 456 | 487 | 499 |
|                 | right ear       | 193               | 246 | 293 | 342 | 370 | 406 | 436 | 469 | 503 |
|                 | left eye        | 185               | 204 | 220 | 260 | 325 | 345 | 372 | 406 | 421 |
|                 | right eye       | 216               | 250 | 327 | 362 | 409 | 456 | 478 | 495 | 517 |
|                 | left front paw  | 210               | 260 | 308 | 335 | 362 | 398 | 415 | 446 | 473 |
|                 | right front paw | 215               | 308 | 356 | 383 | 403 | 426 | 459 | 482 | 507 |
| RT+CTS          | left ear        | 210               | 236 | 261 | 290 | 352 | 383 | 416 | 438 | 462 |
|                 | right ear       | 193               | 253 | 317 | 353 | 406 | 426 | 469 | 483 | 501 |
|                 | left eye        | 206               | 217 | 258 | 279 | 323 | 353 | 381 | 411 | 445 |
|                 | right eye       | 199               | 242 | 320 | 351 | 382 | 421 | 436 | 462 | 491 |
|                 | left front paw  | 214               | 284 | 345 | 392 | 420 | 449 | 478 | 492 | 517 |
|                 | right front paw | 200               | 232 | 275 | 324 | 376 | 423 | 451 | 479 | 506 |

| Respiratory Rate |                 |              |     |     |     |     |     |
|------------------|-----------------|--------------|-----|-----|-----|-----|-----|
| Group            | Sign            | Time (month) |     |     |     |     |     |
|                  |                 | 1            | 2   | 3   | 4   | 5   | 8   |
| Normal           | left ear        | 102          | 119 | 107 | 102 | 118 | 105 |
|                  | right ear       | 90           | 112 | 119 | 116 | 109 | 111 |
|                  | left eye        | 95           | 109 | 115 | 97  | 106 | 119 |
|                  | right eye       | 98           | 111 | 109 | 122 | 124 | 107 |
|                  | left front paw  | 112          | 106 | 121 | 119 | 114 | 103 |
|                  | right front paw | 100          | 93  | 97  | 96  | 98  | 102 |
| RT               | left ear        | 117          | 122 | 134 | 140 | 155 | 169 |
|                  | right ear       | 105          | 113 | 138 | 159 | 161 | 175 |
|                  | left eye        | 108          | 111 | 135 | 147 | 152 | 166 |
|                  | right eye       | 109          | 118 | 141 | 167 | 183 | 195 |
|                  | left front paw  | 91           | 106 | 148 | 162 | 176 | 189 |
|                  | right front paw | 106          | 115 | 146 | 154 | 164 | 177 |
| RT+PND           | left ear        | 102          | 108 | 123 | 127 | 126 | 125 |
|                  | right ear       | 98           | 116 | 126 | 129 | 127 | 119 |
|                  | left eye        | 107          | 109 | 131 | 135 | 124 | 121 |
|                  | right eye       | 92           | 102 | 135 | 130 | 125 | 122 |
|                  | left front paw  | 102          | 115 | 139 | 140 | 138 | 136 |
|                  | right front paw | 97           | 100 | 126 | 125 | 118 | 123 |
| RT+CTS           | left ear        | 109          | 113 | 132 | 129 | 118 | 124 |
|                  | right ear       | 106          | 105 | 127 | 124 | 123 | 119 |
|                  | left eye        | 98           | 115 | 139 | 131 | 127 | 120 |
|                  | right eye       | 105          | 114 | 136 | 128 | 120 | 124 |
|                  | left front paw  | 98           | 108 | 130 | 123 | 117 | 106 |
|                  | right front paw | 90           | 101 | 124 | 129 | 121 | 113 |

|        |                 | Tidal Volume |      |      |      |      |      |
|--------|-----------------|--------------|------|------|------|------|------|
| Group  | Sign            | Time (month) |      |      |      |      |      |
|        |                 | 1            | 2    | 3    | 4    | 5    | 8    |
| Normal | left ear        | 0.86         | 0.83 | 0.82 | 1.04 | 0.81 | 0.95 |
|        | right ear       | 0.78         | 0.88 | 0.85 | 0.98 | 1.05 | 0.98 |
|        | left eye        | 0.83         | 0.86 | 0.89 | 0.82 | 0.93 | 1.12 |
|        | right eye       | 1.01         | 0.99 | 1.03 | 0.93 | 0.86 | 0.79 |
|        | left front paw  | 1.05         | 0.98 | 0.92 | 0.85 | 0.84 | 0.95 |
|        | right front paw | 0.92         | 0.86 | 0.95 | 0.89 | 1.04 | 0.85 |
| RT     | left ear        | 0.83         | 0.8  | 0.79 | 0.56 | 0.58 | 0.59 |
|        | right ear       | 0.75         | 0.73 | 0.72 | 0.44 | 0.43 | 0.49 |
|        | left eye        | 0.82         | 0.8  | 0.67 | 0.39 | 0.47 | 0.48 |
|        | right eye       | 0.98         | 0.85 | 0.65 | 0.46 | 0.52 | 0.5  |
|        | left front paw  | 0.81         | 0.78 | 0.72 | 0.52 | 0.49 | 0.36 |
|        | right front paw | 0.78         | 0.73 | 0.73 | 0.55 | 0.42 | 0.45 |
| RT+PND | left ear        | 0.93         | 0.85 | 0.76 | 0.74 | 0.68 | 0.73 |
|        | right ear       | 0.86         | 0.91 | 0.75 | 0.75 | 0.78 | 0.79 |
|        | left eye        | 0.75         | 0.72 | 0.79 | 0.73 | 0.62 | 0.69 |
|        | right eye       | 0.97         | 0.84 | 0.81 | 0.84 | 0.83 | 0.81 |
|        | left front paw  | 0.87         | 0.83 | 0.86 | 0.95 | 0.91 | 0.84 |
|        | right front paw | 0.92         | 0.89 | 0.83 | 0.85 | 0.89 | 0.82 |
| RT+CTS | left ear        | 0.98         | 0.93 | 0.82 | 0.78 | 0.84 | 0.85 |
|        | right ear       | 0.79         | 0.82 | 0.8  | 0.79 | 0.78 | 0.82 |
|        | left eye        | 0.84         | 0.8  | 0.76 | 0.85 | 0.75 | 0.79 |
|        | right eye       | 0.85         | 0.86 | 0.83 | 0.78 | 0.75 | 0.84 |
|        | left front paw  | 0.9          | 0.83 | 0.82 | 0.83 | 0.82 | 0.91 |
|        | right front paw | 0.82         | 0.86 | 0.73 | 0.77 | 0.88 | 0.93 |

| Maximum Voluntary Ventilation |                 |              |        |        |        |        |        |
|-------------------------------|-----------------|--------------|--------|--------|--------|--------|--------|
| Group                         | Sign            | Time (month) |        |        |        |        |        |
|                               |                 | 1            | 2      | 3      | 4      | 5      | 8      |
| Normal                        | left ear        | 133.82       | 125.88 | 135.26 | 145.53 | 137.99 | 128.75 |
|                               | right ear       | 127.55       | 123    | 122.83 | 130.55 | 135.27 | 137.55 |
|                               | left eye        | 140.89       | 133.41 | 129.34 | 137.62 | 146.27 | 149.72 |
|                               | right eye       | 138.12       | 132.48 | 140.67 | 142.56 | 125.83 | 138.25 |
|                               | left front paw  | 120.39       | 123.76 | 148.65 | 139.07 | 128.19 | 124.82 |
|                               | right front paw | 148.63       | 139.53 | 137.41 | 142.35 | 149.66 | 141.42 |
| RT                            | left ear        | 123.85       | 115.76 | 101.34 | 88.43  | 82.46  | 80.29  |
|                               | right ear       | 136.32       | 127.65 | 97.22  | 84.88  | 80.45  | 79.43  |
|                               | left eye        | 127.32       | 118.27 | 96.98  | 85.27  | 83.22  | 78.67  |
|                               | right eye       | 118.15       | 105.68 | 94.69  | 86.49  | 84.34  | 80.51  |
|                               | left front paw  | 135.21       | 128.45 | 101.34 | 93.44  | 90.57  | 83.34  |
|                               | right front paw | 129.67       | 122.55 | 106.38 | 84.21  | 80.66  | 75.35  |
| RT+PND                        | left ear        | 123.98       | 126.23 | 114.43 | 108.55 | 115.23 | 109.33 |
|                               | right ear       | 129.54       | 123.78 | 109.24 | 120.01 | 121.23 | 115.86 |
|                               | left eye        | 139.32       | 133.48 | 111.26 | 125.34 | 105.31 | 101.66 |
|                               | right eye       | 132.58       | 129.45 | 112.67 | 113.49 | 116.88 | 112.51 |
|                               | left front paw  | 135.59       | 129.33 | 106.93 | 99.94  | 112.43 | 108.25 |
|                               | right front paw | 127.51       | 115.77 | 103.35 | 110.22 | 102.69 | 114.76 |
| RT+CTS                        | left ear        | 136.44       | 125.79 | 108.57 | 115.61 | 120.86 | 117.54 |
|                               | right ear       | 125.12       | 122.55 | 105.82 | 123.49 | 125.15 | 119.95 |
|                               | left eye        | 121.68       | 120.25 | 112.34 | 109.67 | 116.34 | 123.26 |
|                               | right eye       | 128.21       | 117.37 | 91.35  | 114    | 113.54 | 125.73 |
|                               | left front paw  | 137.59       | 134.72 | 118.11 | 117.48 | 110.66 | 118.41 |
|                               | right front paw | 129.53       | 127.36 | 116.42 | 112.3  | 107.39 | 113.21 |

| H&E    |                    |                |                |                |      |                |                |                |      |                |                |                |      |                |                |                |      |
|--------|--------------------|----------------|----------------|----------------|------|----------------|----------------|----------------|------|----------------|----------------|----------------|------|----------------|----------------|----------------|------|
| Group  | Sign               | Time (month)   |                |                |      |                |                |                |      |                |                |                |      |                |                |                |      |
|        |                    | 1              |                |                |      | 3              |                |                |      | 5              |                |                |      | 8              |                |                |      |
|        |                    | No.1<br>visual | No.2<br>visual | No.3<br>visual | Mean | No.1<br>visual | No.2<br>visual | No.3<br>visual | Mean | No.1<br>visual | No.2<br>visual | No.3<br>visual | Mean | No.1<br>visual | No.2<br>visual | No.3<br>visual | Mean |
| Normal | left ear           | 0              | 0              | 1              | 0.33 | 1              | 0              | 0              | 0.33 | 0              | 0              | 0              | 0    | 0              | 1              | 0              | 0.33 |
|        | right ear          | 0              | 0              | 0              | 0    | 0              | 0              | 0              | 0    | 0              | 0              | 0              | 0    | 0              | 0              | 0              | 0    |
|        | left eye           | 0              | 0              | 0              | 0    | 1              | 0              | 0              | 0.33 | 0              | 0              | 0              | 0    | 0              | 0              | 0              | 0    |
|        | right eye          | 1              | 0              | 0              | 0.33 | 0              | 0              | 0              | 0    | 0              | 0              | 0              | 0    | 0              | 0              | 0              | 0    |
|        | left front<br>paw  | 0              | 0              | 0              | 0    | 0              | 1              | 0              | 0.33 | 0              | 0              | 0              | 0    | 0              | 0              | 0              | 0    |
|        | right front<br>paw | 0              | 0              | 0              | 0    | 0              | 0              | 0              | 0    | 0              | 0              | 1              | 0.33 | 0              | 0              | 0              | 0    |
| RT     | left ear           | 1              | 1              | 1              | 1    | 2              | 2              | 2              | 2    | 3              | 3              | 2              | 2.67 | 3              | 3              | 3              | 3    |
|        | right ear          | 1              | 1              | 1              | 1    | 2              | 2              | 2              | 2    | 2              | 2              | 3              | 2.33 | 3              | 2              | 3              | 2.67 |
|        | left eye           | 1              | 1              | 1              | 1    | 2              | 1              | 2              | 1.67 | 3              | 3              | 2              | 2.67 | 3              | 3              | 3              | 3    |
|        | right eye          | 2              | 1              | 1              | 1.33 | 2              | 2              | 3              | 2.33 | 3              | 2              | 3              | 2.67 | 3              | 3              | 3              | 3    |
|        | left front<br>paw  | 1              | 1              | 1              | 1    | 3              | 2              | 2              | 2.33 | 2              | 3              | 3              | 2.67 | 3              | 3              | 3              | 3    |
|        | right front<br>paw | 1              | 2              | 1              | 1.33 | 2              | 2              | 1              | 1.67 | 3              | 3              | 2              | 2.67 | 3              | 3              | 3              | 3    |
| RT+PND | left ear           | 0              | 0              | 1              | 0.33 | 2              | 1              | 2              | 1.67 | 2              | 2              | 2              | 2    | 2              | 3              | 2              | 2.33 |
|        | right ear          | 1              | 0              | 0              | 0.33 | 1              | 2              | 2              | 1.67 | 2              | 2              | 3              | 2.33 | 3              | 2              | 2              | 2.33 |
|        | left eye           | 0              | 0              | 1              | 0.33 | 1              | 1              | 1              | 1    | 2              | 1              | 2              | 1.67 | 2              | 2              | 1              | 1.67 |
|        | right eye          | 0              | 1              | 0              | 0.33 | 2              | 2              | 2              | 2    | 2              | 1              | 2              | 1.67 | 2              | 2              | 2              | 2    |
|        | left front<br>paw  | 1              | 0              | 1              | 0.67 | 2              | 1              | 1              | 1.33 | 1              | 2              | 2              | 1.67 | 2              | 2              | 2              | 2    |
|        | right front<br>paw | 1              | 0              | 2              | 1    | 1              | 2              | 2              | 1.67 | 2              | 2              | 3              | 2.33 | 2              | 2              | 2              | 2    |
| RT+CTS | left ear           | 1              | 1              | 0              | 0.67 | 2              | 2              | 2              | 2    | 2              | 3              | 2              | 2.33 | 2              | 1              | 2              | 1.67 |
|        | right ear          | 0              | 1              | 1              | 0.67 | 1              | 1              | 2              | 1.33 | 1              | 2              | 2              | 1.67 | 2              | 2              | 1              | 1.67 |
|        | left eye           | 1              | 0              | 1              | 0.67 | 1              | 2              | 1              | 1.33 | 2              | 2              | 1              | 1.67 | 2              | 2              | 2              | 2    |
|        | right eye          | 1              | 0              | 1              | 0.67 | 2              | 2              | 2              | 2    | 2              | 1              | 2              | 1.67 | 3              | 2              | 2              | 2.33 |
|        | left front<br>paw  | 0              | 1              | 0              | 0.33 | 2              | 2              | 1              | 1.67 | 2              | 2              | 3              | 2.33 | 2              | 1              | 2              | 1.67 |
|        | right front<br>paw | 1              | 0              | 1              | 0.67 | 1              | 2              | 1              | 1.33 | 1              | 2              | 2              | 1.67 | 2              | 2              | 2              | 2    |

| Masson |                    |                |                |                |      |                |                |                |      |                |                |                |      |                |                |                |      |
|--------|--------------------|----------------|----------------|----------------|------|----------------|----------------|----------------|------|----------------|----------------|----------------|------|----------------|----------------|----------------|------|
| Group  | Sign               | Time (month)   |                |                |      |                |                |                |      |                |                |                |      |                |                |                |      |
|        |                    | 1              |                |                |      | 3              |                |                |      | 5              |                |                |      | 8              |                |                |      |
|        |                    | No.1<br>visual | No.2<br>visual | No.3<br>visual | Mean | No.1<br>visual | No.2<br>visual | No.3<br>visual | Mean | No.1<br>visual | No.2<br>visual | No.3<br>visual | Mean | No.1<br>visual | No.2<br>visual | No.3<br>visual | Mean |
| Normal | left ear           | 0              | 0              | 0              | 0    | 0              | 0              | 0              | 0    | 0              | 0              | 0              | 0    | 0              | 0              | 0              | 0    |
|        | right ear          | 0              | 0              | 1              | 0.33 | 1              | 0              | 0              | 0.33 | 0              | 0              | 0              | 0    | 0              | 0              | 0              | 0    |
|        | left eye           | 0              | 0              | 0              | 0    | 0              | 0              | 0              | 0    | 1              | 0              | 0              | 0.33 | 0              | 0              | 0              | 0    |
|        | right eye          | 0              | 0              | 0              | 0    | 1              | 0              | 1              | 0.67 | 0              | 0              | 0              | 0    | 0              | 0              | 0              | 0    |
|        | left front<br>paw  | 0              | 0              | 0              | 0    | 0              | 0              | 0              | 0    | 1              | 0              | 1              | 0.67 | 0              | 1              | 0              | 0.33 |
|        | right front<br>paw | 0              | 0              | 0              | 0    | 0              | 0              | 0              | 0    | 0              | 1              | 0              | 0.33 | 0              | 0              | 0              | 0    |
| RT     | left ear           | 1              | 0              | 0              | 0.33 | 0              | 1              | 1              | 0.67 | 2              | 2              | 3              | 2.33 | 3              | 3              | 3              | 3    |
|        | right ear          | 0              | 1              | 0              | 0.33 | 0              | 0              | 1              | 0.33 | 1              | 2              | 1              | 1.33 | 3              | 3              | 3              | 3    |
|        | left eye           | 1              | 0              | 0              | 0.33 | 1              | 1              | 1              | 1    | 3              | 2              | 2              | 2.33 | 2              | 3              | 3              | 2.67 |
|        | right eye          | 0              | 0              | 1              | 0.33 | 0              | 1              | 1              | 0.67 | 2              | 2              | 1              | 1.67 | 3              | 3              | 3              | 3    |
|        | left front<br>paw  | 0              | 1              | 1              | 0.67 | 1              | 1              | 1              | 1    | 2              | 2              | 2              | 2    | 3              | 3              | 3              | 3    |
|        | right front<br>paw | 1              | 0              | 0              | 0.33 | 0              | 1              | 0              | 0.33 | 3              | 2              | 2              | 2.33 | 3              | 3              | 3              | 3    |
| RT+PND | left ear           | 1              | 0              | 0              | 0.33 | 0              | 0              | 1              | 0.33 | 2              | 2              | 1              | 1.67 | 3              | 3              | 2              | 2.67 |
|        | right ear          | 0              | 0              | 0              | 0    | 0              | 0              | 1              | 0.33 | 2              | 1              | 2              | 1.67 | 2              | 2              | 2              | 2    |
|        | left eye           | 0              | 1              | 0              | 0.33 | 0              | 0              | 0              | 0    | 1              | 1              | 2              | 1.33 | 2              | 3              | 2              | 2.33 |
|        | right eye          | 1              | 0              | 0              | 0.33 | 0              | 0              | 0              | 0    | 1              | 2              | 2              | 1.67 | 2              | 2              | 2              | 2    |
|        | left front<br>paw  | 1              | 0              | 0              | 0.33 | 1              | 1              | 0              | 0.67 | 1              | 2              | 1              | 1.33 | 3              | 2              | 3              | 2.67 |
|        | right front<br>paw | 0              | 1              | 0              | 0.33 | 0              | 0              | 1              | 0.33 | 1              | 2              | 1              | 1.33 | 3              | 3              | 3              | 3    |
| RT+CTS | left ear           | 0              | 1              | 1              | 0.67 | 1              | 0              | 0              | 0.33 | 2              | 1              | 1              | 1.33 | 2              | 2              | 2              | 2    |
|        | right ear          | 0              | 1              | 1              | 0.67 | 1              | 1              | 0              | 0.67 | 1              | 0              | 1              | 0.67 | 1              | 1              | 2              | 1.33 |
|        | left eye           | 1              | 0              | 0              | 0.33 | 0              | 0              | 1              | 0.33 | 2              | 1              | 1              | 1.33 | 2              | 2              | 2              | 2    |
|        | right eye          | 0              | 0              | 0              | 0    | 0              | 0              | 0              | 0    | 2              | 1              | 1              | 1.33 | 1              | 2              | 2              | 1.67 |
|        | left front<br>paw  | 1              | 0              | 0              | 0.33 | 1              | 0              | 0              | 0.33 | 1              | 0              | 1              | 0.67 | 2              | 2              | 2              | 2    |
|        | right front<br>paw | 0              | 0              | 0              | 0    | 0              | 0              | 0              | 0    | 1              | 2              | 1              | 1.33 | 2              | 2              | 1              | 1.67 |

| Pulmonary Coefficient |                 |              |       |       |       |       |       |
|-----------------------|-----------------|--------------|-------|-------|-------|-------|-------|
| Group                 | Sign            | Time (month) |       |       |       |       |       |
|                       |                 | 1            | 2     | 3     | 4     | 5     | 8     |
| Normal                | left ear        | 6.58         | 6.89  | 6.75  | 5.65  | 6.13  | 5.14  |
|                       | right ear       | 6.46         | 6.34  | 6.37  | 6.96  | 5.18  | 6.69  |
|                       | left eye        | 6.97         | 6.17  | 6.65  | 5.68  | 6.81  | 5.45  |
|                       | right eye       | 6.98         | 5.77  | 6.42  | 6.34  | 5.54  | 5.83  |
|                       | left front paw  | 6.61         | 5.99  | 5.23  | 6.39  | 6.53  | 5.48  |
|                       | right front paw | 5.83         | 6.69  | 5.98  | 6.15  | 6.65  | 5.29  |
| RT                    | left ear        | 10.62        | 12.71 | 12.83 | 13.15 | 13.35 | 13.95 |
|                       | right ear       | 10.76        | 10.87 | 11.63 | 11.84 | 12.75 | 13.63 |
|                       | left eye        | 9.54         | 9.81  | 9.95  | 10.65 | 12.02 | 14.11 |
|                       | right eye       | 11.13        | 11.79 | 12.32 | 12.89 | 13.34 | 13.75 |
|                       | left front paw  | 11.69        | 12.55 | 12.97 | 13.26 | 13.78 | 14.28 |
|                       | right front paw | 10.45        | 11.88 | 11.95 | 12.44 | 13.42 | 14.65 |
| RT+PND                | left ear        | 9.59         | 9.64  | 8.79  | 8.51  | 8.09  | 7.62  |
|                       | right ear       | 8.42         | 8.58  | 8.26  | 8.02  | 7.88  | 7.01  |
|                       | left eye        | 10.57        | 9.88  | 9.67  | 8.92  | 8.63  | 7.86  |
|                       | right eye       | 9.16         | 8.92  | 8.69  | 8.29  | 7.92  | 7.48  |
|                       | left front paw  | 9.85         | 9.63  | 8.47  | 7.88  | 7.65  | 6.93  |
|                       | right front paw | 10.61        | 9.57  | 8.98  | 8.71  | 8.52  | 7.97  |
| RT+CTS                | left ear        | 9.77         | 9.64  | 8.92  | 8.37  | 7.84  | 6.98  |
|                       | right ear       | 9.98         | 9.42  | 9.06  | 8.83  | 8.15  | 6.86  |
|                       | left eye        | 9.49         | 9.27  | 8.81  | 8.07  | 7.56  | 6.76  |
|                       | right eye       | 9.54         | 9.17  | 8.72  | 7.84  | 7.21  | 6.64  |
|                       | left front paw  | 10.52        | 9.87  | 9.74  | 8.93  | 8.46  | 7.67  |
|                       | right front paw | 10.69        | 9.82  | 9.68  | 9.23  | 8.89  | 6.42  |



| <b><math>\alpha</math>-SMA</b> |                 |             |             |             |      |             |             |             |      |             |             |             |      |             |             |             |      |
|--------------------------------|-----------------|-------------|-------------|-------------|------|-------------|-------------|-------------|------|-------------|-------------|-------------|------|-------------|-------------|-------------|------|
| <b>Time (month)</b>            |                 |             |             |             |      |             |             |             |      |             |             |             |      |             |             |             |      |
|                                |                 | 1           |             |             |      | 3           |             |             |      | 5           |             |             |      | 8           |             |             |      |
| Group                          | Sign            | No.1 visual | No.2 visual | No.3 visual | Mean | No.1 visual | No.2 visual | No.3 visual | Mean | No.1 visual | No.2 visual | No.3 visual | Mean | No.1 visual | No.2 visual | No.3 visual | Mean |
| Normal                         | left ear        | 1           | 0           | 1           | 0.67 | 1           | 1           | 1           | 1    | 0           | 1           | 1           | 0.67 | 1           | 0           | 1           | 0.67 |
|                                | right ear       | 1           | 1           | 1           | 1    | 0           | 0           | 1           | 0.33 | 0           | 1           | 0           | 0.33 | 1           | 1           | 1           | 1    |
|                                | left eye        | 0           | 1           | 0           | 0.33 | 0           | 1           | 1           | 0.67 | 1           | 1           | 1           | 1    | 1           | 0           | 1           | 0.67 |
|                                | right eye       | 0           | 1           | 1           | 0.67 | 1           | 0           | 1           | 0.67 | 1           | 0           | 0           | 0.33 | 0           | 1           | 1           | 0.67 |
|                                | left front paw  | 1           | 1           | 0           | 0.67 | 1           | 1           | 1           | 1    | 0           | 1           | 1           | 0.67 | 1           | 1           | 0           | 0.67 |
|                                | right front paw | 1           | 0           | 1           | 0.67 | 1           | 1           | 0           | 0.67 | 1           | 1           | 0           | 0.67 | 1           | 1           | 1           | 1    |
| RT                             | left ear        | 3           | 2           | 2           | 2.33 | 3           | 2           | 2           | 2.33 | 4           | 4           | 4           | 4    | 3           | 4           | 4           | 3.67 |
|                                | right ear       | 2           | 2           | 1           | 1.67 | 3           | 3           | 2           | 2.67 | 4           | 3           | 3           | 3.33 | 4           | 4           | 4           | 4    |
|                                | left eye        | 2           | 1           | 2           | 1.67 | 3           | 4           | 4           | 3.67 | 3           | 3           | 4           | 3.33 | 4           | 4           | 3           | 3.67 |
|                                | right eye       | 2           | 3           | 2           | 2.33 | 4           | 3           | 3           | 3.33 | 4           | 4           | 6           | 4.67 | 4           | 6           | 4           | 4.67 |
|                                | left front paw  | 2           | 2           | 2           | 2    | 2           | 3           | 2           | 2.33 | 3           | 4           | 4           | 3.67 | 3           | 4           | 4           | 3.67 |
|                                | right front paw | 2           | 3           | 2           | 2.33 | 3           | 3           | 3           | 3    | 3           | 3           | 3           | 3    | 4           | 4           | 6           | 4.67 |
| RT+PND                         | left ear        | 1           | 1           | 2           | 1.33 | 2           | 1           | 2           | 1.67 | 2           | 3           | 3           | 2.67 | 3           | 2           | 3           | 2.67 |
|                                | right ear       | 2           | 2           | 1           | 2    | 1           | 2           | 1           | 1.33 | 3           | 2           | 2           | 2.33 | 2           | 2           | 3           | 2.33 |
|                                | left eye        | 2           | 1           | 2           | 1.67 | 2           | 1           | 1           | 1.33 | 1           | 2           | 1           | 1.33 | 3           | 3           | 3           | 3    |
|                                | right eye       | 1           | 2           | 2           | 1.67 | 1           | 2           | 2           | 1.67 | 3           | 3           | 2           | 2.67 | 3           | 3           | 4           | 3.33 |
|                                | left front paw  | 2           | 2           | 2           | 2    | 2           | 2           | 2           | 2    | 2           | 2           | 1           | 1.67 | 3           | 3           | 3           | 3    |
|                                | right front paw | 2           | 1           | 1           | 1.33 | 2           | 1           | 2           | 1.67 | 3           | 2           | 2           | 2.33 | 3           | 3           | 2           | 2.67 |
| RT+CTS                         | left ear        | 2           | 2           | 1           | 1.67 | 2           | 1           | 1           | 1.33 | 2           | 1           | 2           | 1.67 | 2           | 2           | 2           | 2    |
|                                | right ear       | 1           | 2           | 2           | 1.67 | 2           | 2           | 2           | 2    | 2           | 2           | 1           | 1.67 | 2           | 3           | 2           | 2.33 |
|                                | left eye        | 1           | 1           | 1           | 1    | 1           | 2           | 2           | 1.67 | 2           | 1           | 2           | 1.67 | 2           | 2           | 2           | 2    |
|                                | right eye       | 2           | 1           | 2           | 1.67 | 1           | 1           | 1           | 1    | 2           | 2           | 2           | 2    | 3           | 2           | 2           | 2.33 |
|                                | left front paw  | 1           | 2           | 2           | 1.67 | 1           | 1           | 2           | 1.33 | 2           | 2           | 2           | 2    | 2           | 2           | 2           | 2    |
|                                | right front paw | 2           | 2           | 2           | 2    | 1           | 2           | 1           | 1.33 | 3           | 2           | 2           | 2.33 | 3           | 2           | 2           | 2.33 |

HYP-1month

| HYP-1month |        |           |         |         |         |         |         |               |       |       |       |       |       |                        |      |                  |                |                    |
|------------|--------|-----------|---------|---------|---------|---------|---------|---------------|-------|-------|-------|-------|-------|------------------------|------|------------------|----------------|--------------------|
|            |        | OD Values |         |         |         |         |         | Concentration |       |       |       |       |       | Concentration(average) | SEM  | repeat of biolog | P value vs. RT | P value vs. RT+PND |
| Name       | Group  | 1         | 2       | 3       | 4       | 5       | 6       | 1             | 2     | 3     | 4     | 5     | 6     |                        |      |                  |                |                    |
| HYP        | Normal | 0.08901   | 0.08906 | 0.08901 | 0.08892 | 0.08911 | 0.08898 | 0.389         | 0.406 | 0.389 | 0.354 | 0.424 | 0.375 | 0.39                   | 0.01 | 6                | <0.01          |                    |
|            | RT     | 0.08918   | 0.08943 | 0.08914 | 0.08910 | 0.08931 | 0.08949 | 0.452         | 0.543 | 0.437 | 0.422 | 0.498 | 0.566 | 0.49                   | 0.02 | 6                |                |                    |
|            | RT+PND | 0.08900   | 0.08909 | 0.08918 | 0.08915 | 0.08885 | 0.08924 | 0.385         | 0.418 | 0.451 | 0.441 | 0.329 | 0.473 | 0.42                   | 0.02 | 6                | <0.05          |                    |
|            | RT+CTS | 0.08902   | 0.08899 | 0.08925 | 0.08919 | 0.08898 | 0.08921 | 0.392         | 0.381 | 0.477 | 0.456 | 0.375 | 0.463 | 0.42                   | 0.02 | 6                | <0.05          | ns                 |
|            |        |           |         |         |         |         |         |               |       |       |       |       |       |                        |      |                  |                |                    |
|            |        |           |         |         |         |         |         |               |       |       |       |       |       |                        |      |                  |                |                    |

HYP-3month

| HYP-3month |        |           |         |         |         |         |         |               |       |       |       |       |       |                        |      |                  |                |                    |
|------------|--------|-----------|---------|---------|---------|---------|---------|---------------|-------|-------|-------|-------|-------|------------------------|------|------------------|----------------|--------------------|
|            |        | OD Values |         |         |         |         |         | Concentration |       |       |       |       |       | Concentration(average) | SEM  | repeat of biolog | P value vs. RT | P value vs. RT+PND |
| Name       | Group  | 1         | 2       | 3       | 4       | 5       | 6       | 1             | 2     | 3     | 4     | 5     | 6     |                        |      |                  |                |                    |
| HYP        | Normal | 0.08918   | 0.08902 | 0.08902 | 0.08897 | 0.08914 | 0.08907 | 0.452         | 0.391 | 0.393 | 0.373 | 0.436 | 0.409 | 0.41                   | 0.01 | 6                | <0.01          |                    |
|            | RT     | 0.08924   | 0.08950 | 0.08920 | 0.08931 | 0.08933 | 0.08951 | 0.474         | 0.569 | 0.458 | 0.497 | 0.506 | 0.573 | 0.51                   | 0.02 | 6                |                |                    |
|            | RT+PND | 0.08919   | 0.08910 | 0.08916 | 0.08923 | 0.08893 | 0.08926 | 0.453         | 0.42  | 0.445 | 0.468 | 0.357 | 0.482 | 0.44                   | 0.02 | 6                | <0.01          |                    |
|            | RT+CTS | 0.08910   | 0.08915 | 0.08930 | 0.08928 | 0.08901 | 0.08930 | 0.422         | 0.438 | 0.494 | 0.488 | 0.386 | 0.496 | 0.45                   | 0.02 | 6                | <0.05          | ns                 |
|            |        |           |         |         |         |         |         |               |       |       |       |       |       |                        |      |                  |                |                    |
|            |        |           |         |         |         |         |         |               |       |       |       |       |       |                        |      |                  |                |                    |

HYP-5month

| HYP-5month |        |           |         |         |         |         |         |               |       |       |       |       |       |                        |      |                  |                |                    |
|------------|--------|-----------|---------|---------|---------|---------|---------|---------------|-------|-------|-------|-------|-------|------------------------|------|------------------|----------------|--------------------|
|            |        | OD Values |         |         |         |         |         | Concentration |       |       |       |       |       | Concentration(average) | SEM  | repeat of biolog | P value vs. RT | P value vs. RT+PND |
| Name       | Group  | 1         | 2       | 3       | 4       | 5       | 6       | 1             | 2     | 3     | 4     | 5     | 6     |                        |      |                  |                |                    |
| HYP        | Normal | 0.08911   | 0.08905 | 0.08901 | 0.08899 | 0.08909 | 0.08907 | 0.426         | 0.402 | 0.386 | 0.382 | 0.417 | 0.411 | 0.40                   | 0.01 | 6                | <0.01          |                    |
|            | RT     | 0.08949   | 0.08955 | 0.08924 | 0.08951 | 0.08941 | 0.08955 | 0.565         | 0.588 | 0.472 | 0.572 | 0.536 | 0.588 | 0.55                   | 0.02 | 6                |                |                    |
|            | RT+PND | 0.08927   | 0.08922 | 0.08931 | 0.08924 | 0.08901 | 0.08941 | 0.483         | 0.466 | 0.499 | 0.474 | 0.388 | 0.536 | 0.47                   | 0.02 | 6                | <0.01          |                    |
|            | RT+CTS | 0.08916   | 0.08923 | 0.08925 | 0.08918 | 0.08905 | 0.08935 | 0.443         | 0.469 | 0.478 | 0.449 | 0.403 | 0.514 | 0.46                   | 0.02 | 6                | <0.01          | ns                 |
|            |        |           |         |         |         |         |         |               |       |       |       |       |       |                        |      |                  |                |                    |
|            |        |           |         |         |         |         |         |               |       |       |       |       |       |                        |      |                  |                |                    |

| HYP-8month |        |           |         |         |         |         |         |               |       |       |       |       |       |                        |      |                  |                |                    |
|------------|--------|-----------|---------|---------|---------|---------|---------|---------------|-------|-------|-------|-------|-------|------------------------|------|------------------|----------------|--------------------|
|            |        | OD Values |         |         |         |         |         | Concentration |       |       |       |       |       | Concentration(average) | SEM  | repeat of biolog | P value vs. RT | P value vs. RT+PND |
| Name       | Group  | 1         | 2       | 3       | 4       | 5       | 6       | 1             | 2     | 3     | 4     | 5     | 6     |                        |      |                  |                |                    |
| HYP        | Normal | 0.08909   | 0.08908 | 0.08896 | 0.08896 | 0.08913 | 0.08912 | 0.418         | 0.413 | 0.371 | 0.368 | 0.434 | 0.427 | 0.41                   | 0.01 | 6                | <0.01          |                    |
|            | RT     | 0.08960   | 0.08968 | 0.08941 | 0.08962 | 0.08954 | 0.08965 | 0.606         | 0.637 | 0.534 | 0.612 | 0.584 | 0.624 | 0.60                   | 0.01 | 6                |                |                    |
|            | RT+PND | 0.08933   | 0.08917 | 0.08938 | 0.08929 | 0.08905 | 0.08938 | 0.505         | 0.447 | 0.523 | 0.493 | 0.403 | 0.525 | 0.48                   | 0.02 | 6                | <0.01          |                    |
|            | RT+CTS | 0.08923   | 0.08911 | 0.08932 | 0.08913 | 0.08912 | 0.08938 | 0.471         | 0.426 | 0.503 | 0.432 | 0.427 | 0.526 | 0.46                   | 0.02 | 6                | <0.01          | ns                 |
|            |        |           |         |         |         |         |         |               |       |       |       |       |       |                        |      |                  |                |                    |
|            |        |           |         |         |         |         |         |               |       |       |       |       |       |                        |      |                  |                |                    |

## TGF-β1 IHC

Time (month)

|        |                 | 1           |             |             |      | 3           |             |             |      | 5           |             |             |      | 8           |             |             |      |      |
|--------|-----------------|-------------|-------------|-------------|------|-------------|-------------|-------------|------|-------------|-------------|-------------|------|-------------|-------------|-------------|------|------|
| Group  | Sign            | No.1 visual | No.2 visual | No.3 visual | Mean | No.1 visual | No.2 visual | No.3 visual | Mean | No.1 visual | No.2 visual | No.3 visual | Mean | No.1 visual | No.2 visual | No.3 visual | Mean |      |
| Normal | left ear        | 1           | 1           | 0           | 0.67 | 0           | 1           | 0           | 0.33 | 1           | 2           | 0           | 1    | 0           | 1           | 1           | 0.67 |      |
|        | right ear       | 0           | 1           | 0           | 0.33 | 1           | 1           | 0           | 0.67 | 0           | 1           | 1           | 0.67 | 1           | 1           | 0           | 0.67 |      |
|        | left eye        | 0           | 0           | 0           | 0    | 1           | 0           | 0           | 0.33 | 1           | 1           | 0           | 0.67 | 0           | 1           | 0           | 0.33 |      |
|        | right eye       | 1           | 0           | 1           | 0.67 | 0           | 1           | 1           | 0.67 | 0           | 0           | 1           | 0.33 | 1           | 0           | 0           | 0.33 |      |
|        | left front paw  | 0           | 1           | 0           | 0.33 | 1           | 1           | 1           | 1    | 1           | 1           | 0           | 1    | 0.67        | 1           | 1           | 0    | 0.67 |
|        | right front paw | 0           | 1           | 1           | 0.67 | 1           | 1           | 0           | 0.67 | 0           | 1           | 0           | 0.33 | 0           | 1           | 1           | 0.67 |      |
| RT     | left ear        | 4           | 6           | 6           | 5.33 | 6           | 8           | 8           | 7.33 | 12          | 12          | 9           | 11   | 12          | 9           | 12          | 11   |      |
|        | right ear       | 6           | 8           | 9           | 7.67 | 8           | 8           | 12          | 9.33 | 9           | 9           | 12          | 10   | 9           | 12          | 12          | 11   |      |
|        | left eye        | 6           | 8           | 6           | 6.67 | 9           | 9           | 9           | 9    | 8           | 12          | 9           | 9.67 | 12          | 12          | 12          | 12   |      |
|        | right eye       | 6           | 8           | 9           | 7.67 | 6           | 8           | 12          | 8.67 | 8           | 9           | 8           | 8.33 | 12          | 9           | 12          | 11   |      |
|        | left front paw  | 9           | 6           | 6           | 7    | 8           | 6           | 9           | 7.67 | 9           | 8           | 9           | 8.67 | 9           | 12          | 9           | 10   |      |
|        | right front paw | 8           | 6           | 6           | 6.67 | 12          | 9           | 9           | 10   | 12          | 9           | 9           | 10   | 12          | 12          | 9           | 11   |      |
| RT+PND | left ear        | 4           | 2           | 2           | 2.67 | 4           | 6           | 4           | 4.67 | 6           | 6           | 8           | 6.67 | 8           | 6           | 9           | 7.67 |      |
|        | right ear       | 2           | 4           | 4           | 3.33 | 6           | 2           | 4           | 4    | 8           | 8           | 6           | 7.33 | 6           | 9           | 9           | 8    |      |
|        | left eye        | 2           | 3           | 2           | 2.33 | 4           | 4           | 4           | 4    | 3           | 4           | 6           | 4.33 | 6           | 6           | 6           | 6    |      |
|        | right eye       | 2           | 2           | 4           | 2.67 | 6           | 3           | 6           | 5    | 6           | 3           | 6           | 5    | 9           | 8           | 9           | 8.67 |      |
|        | left front paw  | 2           | 3           | 4           | 3    | 4           | 2           | 4           | 3.33 | 8           | 4           | 6           | 6    | 9           | 9           | 9           | 9    |      |
|        | right front paw | 3           | 4           | 2           | 3    | 4           | 6           | 2           | 4    | 6           | 3           | 4           | 4.33 | 8           | 9           | 9           | 8.67 |      |
| RT+CTS | left ear        | 4           | 2           | 2           | 2.67 | 3           | 6           | 4           | 4.33 | 4           | 3           | 6           | 4.33 | 8           | 8           | 9           | 8.33 |      |
|        | right ear       | 2           | 3           | 2           | 2.33 | 6           | 2           | 4           | 4    | 6           | 4           | 4           | 4.67 | 6           | 8           | 6           | 6.67 |      |
|        | left eye        | 4           | 2           | 4           | 3.33 | 4           | 4           | 6           | 4.67 | 3           | 4           | 6           | 4.33 | 9           | 6           | 9           | 8    |      |
|        | right eye       | 3           | 2           | 2           | 2.33 | 3           | 6           | 3           | 4    | 6           | 4           | 4           | 4.67 | 9           | 8           | 6           | 7.67 |      |
|        | left front paw  | 2           | 4           | 4           | 3.33 | 4           | 6           | 4           | 4.67 | 4           | 6           | 4           | 4.67 | 8           | 6           | 6           | 6.67 |      |
|        | right front paw | 4           | 2           | 4           | 3.33 | 6           | 4           | 4           | 4.67 | 8           | 6           | 6           | 6.67 | 6           | 4           | 8           | 6    |      |

| CTGF         |                |             |             |             |      |             |             |             |      |             |             |             |      |             |             |             |      |
|--------------|----------------|-------------|-------------|-------------|------|-------------|-------------|-------------|------|-------------|-------------|-------------|------|-------------|-------------|-------------|------|
| Time (month) |                |             |             |             |      |             |             |             |      |             |             |             |      |             |             |             |      |
| Group        | Sign           | 1           |             |             |      | 3           |             |             |      | 5           |             |             |      | 8           |             |             |      |
|              |                | No.1 visual | No.2 visual | No.3 visual | Mean | No.1 visual | No.2 visual | No.3 visual | Mean | No.1 visual | No.2 visual | No.3 visual | Mean | No.1 visual | No.2 visual | No.3 visual | Mean |
| Normal       | left ear       | 0           | 1           | 1           | 0.67 | 0           | 0           | 0           | 0    | 0           | 0           | 0           | 0    | 1           | 0           | 1           | 0.67 |
|              | right ear      | 0           | 0           | 1           | 0.33 | 0           | 1           | 0           | 0.33 | 0           | 0           | 1           | 0.33 | 0           | 0           | 0           | 0    |
|              | left eye       | 0           | 0           | 0           | 0    | 0           | 0           | 0           | 0    | 0           | 1           | 0           | 0.33 | 0           | 1           | 0           | 0.33 |
|              | right eye      | 1           | 0           | 1           | 0.67 | 0           | 0           | 0           | 0    | 0           | 0           | 0           | 0    | 1           | 0           | 0           | 0.33 |
|              | left front paw | 0           | 0           | 0           | 0    | 0           | 1           | 0           | 0.33 | 1           | 0           | 0           | 0.33 | 0           | 0           | 0           | 0    |
|              | right front    | 0           | 1           | 0           | 0.33 | 0           | 0           | 0           | 0    | 0           | 0           | 0           | 0    | 0           | 0           | 0           | 0    |
| RT           | left ear       | 2           | 1           | 1           | 1.33 | 4           | 3           | 3           | 3.33 | 4           | 4           | 6           | 4.67 | 8           | 8           | 9           | 8.33 |
|              | right ear      | 1           | 1           | 1           | 1    | 3           | 3           | 4           | 3.33 | 4           | 6           | 4           | 4.67 | 6           | 6           | 8           | 6.67 |
|              | left eye       | 1           | 2           | 2           | 1.67 | 4           | 4           | 3           | 3.67 | 4           | 4           | 6           | 4.67 | 8           | 8           | 9           | 8.33 |
|              | right eye      | 2           | 1           | 1           | 1.33 | 3           | 3           | 4           | 3.33 | 6           | 4           | 6           | 5.33 | 6           | 6           | 6           | 6    |
|              | left front paw | 1           | 2           | 1           | 1.33 | 3           | 3           | 3           | 3    | 8           | 6           | 6           | 6.67 | 9           | 9           | 8           | 8.67 |
|              | right front    | 1           | 2           | 1           | 1.33 | 3           | 4           | 4           | 3.67 | 4           | 6           | 4           | 4.67 | 9           | 8           | 8           | 8.33 |
| RT+PND       | left ear       | 2           | 1           | 1           | 1.33 | 4           | 3           | 3           | 3.33 | 4           | 6           | 6           | 5.33 | 4           | 6           | 6           | 5.33 |
|              | right ear      | 1           | 1           | 1           | 1    | 3           | 3           | 3           | 3    | 4           | 4           | 3           | 3.67 | 6           | 8           | 6           | 6.67 |
|              | left eye       | 1           | 2           | 1           | 1.33 | 3           | 4           | 3           | 3.33 | 3           | 4           | 4           | 3.67 | 6           | 8           | 8           | 7.33 |
|              | right eye      | 1           | 1           | 2           | 1.33 | 4           | 3           | 4           | 3.67 | 4           | 3           | 4           | 3.67 | 4           | 4           | 6           | 4.67 |
|              | left front paw | 1           | 1           | 0           | 0.67 | 3           | 3           | 3           | 3    | 4           | 4           | 4           | 4    | 6           | 6           | 6           | 6    |
|              | right front    | 1           | 1           | 1           | 1    | 3           | 4           | 3           | 3.33 | 3           | 4           | 3           | 3.33 | 8           | 6           | 4           | 6    |
| RT+CTS       | left ear       | 1           | 1           | 1           | 1    | 3           | 3           | 3           | 3    | 4           | 4           | 6           | 4.67 | 8           | 8           | 6           | 7.33 |
|              | right ear      | 1           | 2           | 1           | 1.33 | 4           | 3           | 3           | 3.33 | 6           | 6           | 4           | 5.33 | 6           | 8           | 6           | 6.67 |
|              | left eye       | 1           | 2           | 1           | 1.33 | 3           | 4           | 4           | 3.67 | 4           | 4           | 4           | 4    | 6           | 6           | 8           | 6.67 |
|              | right eye      | 2           | 1           | 1           | 1.33 | 3           | 3           | 4           | 3.33 | 4           | 6           | 6           | 5.33 | 8           | 8           | 6           | 7.33 |
|              | left front paw | 1           | 1           | 2           | 1.33 | 4           | 4           | 3           | 3.67 | 4           | 4           | 6           | 4.67 | 8           | 6           | 6           | 6.67 |
|              | right front    | 1           | 1           | 1           | 1    | 3           | 3           | 3           | 3    | 6           | 4           | 4           | 4.67 | 6           | 6           | 8           | 6.67 |

| CTGF-1month |        |           |         |         |         |         |         |               |        |        |        |        |        |                        |      |                  |                |                    |
|-------------|--------|-----------|---------|---------|---------|---------|---------|---------------|--------|--------|--------|--------|--------|------------------------|------|------------------|----------------|--------------------|
|             |        | OD Values |         |         |         |         |         | Concentration |        |        |        |        |        | Concentration(average) | SEM  | repeat of biolog | P value vs. RT | P value vs. RT+PND |
| Name        | Group  | 1         | 2       | 3       | 4       | 5       | 6       | 1             | 2      | 3      | 4      | 5      | 6      |                        |      |                  |                |                    |
| CTGF        | Normal | 0.50022   | 0.50774 | 0.53640 | 0.50596 | 0.48930 | 0.47849 | 152.63        | 155.42 | 166.05 | 154.76 | 148.58 | 144.57 | 153.67                 | 2.99 | 6                | ns             |                    |
|             | RT     | 0.52106   | 0.55500 | 0.52939 | 0.51661 | 0.49777 | 0.51453 | 160.36        | 172.95 | 163.45 | 158.71 | 151.72 | 157.94 | 160.86                 | 2.89 | 6                |                |                    |
|             | RT+PND | 0.47609   | 0.52766 | 0.50639 | 0.50373 | 0.48184 | 0.51179 | 143.68        | 162.81 | 154.92 | 153.93 | 145.81 | 156.92 | 153.01                 | 2.91 | 6                | ns             |                    |
|             | RT+CTS | 0.49521   | 0.50470 | 0.53181 | 0.50785 | 0.49761 | 0.51863 | 150.77        | 154.29 | 164.35 | 155.46 | 151.66 | 159.46 | 156.00                 | 2.09 | 6                | ns             | ns                 |
|             |        |           |         |         |         |         |         |               |        |        |        |        |        |                        |      |                  |                |                    |
|             |        |           |         |         |         |         |         |               |        |        |        |        |        |                        |      |                  |                |                    |



| CTGF-3month |        |           |         |         |         |         |         |               |        |        |        |        |        |                        |       |                      |                |                    |
|-------------|--------|-----------|---------|---------|---------|---------|---------|---------------|--------|--------|--------|--------|--------|------------------------|-------|----------------------|----------------|--------------------|
|             |        | OD Values |         |         |         |         |         | Concentration |        |        |        |        |        | Concentration(average) | SEM   | Repeat of biological | P value vs. RT | P value vs. RT+PND |
| Name        | Group  | 1         | 2       | 3       | 4       | 5       | 6       | 1             | 2      | 3      | 4      | 5      | 6      |                        |       |                      |                |                    |
| CTGF        | Normal | 0.50397   | 0.46364 | 0.49809 | 0.47569 | 0.58821 | 0.57969 | 154.02        | 139.06 | 151.84 | 143.53 | 185.27 | 182.11 | 159.31                 | 8.03  | 6                    | <0.01          |                    |
|             | RT     | 0.95794   | 0.98374 | 1.11194 | 1.07094 | 0.89395 | 0.85020 | 322.43        | 332    | 379.56 | 364.35 | 298.69 | 282.46 | 329.92                 | 15.21 | 6                    |                |                    |
|             | RT+PND | 0.91796   | 0.86551 | 0.83761 | 0.91901 | 0.85723 | 0.88022 | 307.6         | 288.14 | 277.79 | 307.99 | 285.07 | 293.6  | 293.37                 | 5.02  | 6                    | ns             |                    |
|             | RT+CTS | 0.94818   | 0.93282 | 0.90254 | 0.84588 | 0.91608 | 0.86378 | 318.81        | 313.11 | 301.88 | 280.86 | 306.9  | 287.5  | 301.51                 | 6.02  | 6                    | ns             | ns                 |
|             |        |           |         |         |         |         |         |               |        |        |        |        |        |                        |       |                      |                |                    |
|             |        |           |         |         |         |         |         |               |        |        |        |        |        |                        |       |                      |                |                    |

**CTGF-5month**

| CTGF-5month |        |           |         |         |         |         |         |               |        |        |        |        |        |                        |      |                  |                |                    |
|-------------|--------|-----------|---------|---------|---------|---------|---------|---------------|--------|--------|--------|--------|--------|------------------------|------|------------------|----------------|--------------------|
|             |        | OD Values |         |         |         |         |         | Concentration |        |        |        |        |        | Concentration(average) | SEM  | repeat of biolog | P value vs. RT | P value vs. RT+PND |
| Name        | Group  | 1         | 2       | 3       | 4       | 5       | 6       | 1             | 2      | 3      | 4      | 5      | 6      |                        |      |                  |                |                    |
| CTGF        | Normal | 0.51014   | 0.46086 | 0.47817 | 0.52232 | 0.49041 | 0.58988 | 156.31        | 138.03 | 144.45 | 160.83 | 148.99 | 185.89 | 155.75                 | 6.88 | 6                | <0.01          |                    |
|             | RT     | 1.01053   | 1.04490 | 1.07647 | 0.99943 | 0.99374 | 1.10787 | 341.94        | 354.69 | 366.4  | 337.82 | 335.71 | 378.05 | 352.44                 | 6.98 | 6                |                |                    |
|             | RT+PND | 0.96411   | 0.93845 | 0.92023 | 1.00342 | 0.95047 | 0.98312 | 324.72        | 315.2  | 308.44 | 339.3  | 319.66 | 331.77 | 323.18                 | 4.58 | 6                | <0.01          |                    |
|             | RT+CTS | 1.04528   | 1.03129 | 0.99724 | 0.96969 | 1.01913 | 0.95260 | 354.83        | 349.64 | 337.01 | 326.79 | 345.13 | 320.45 | 338.98                 | 5.47 | 6                | ns             | ns                 |
|             |        |           |         |         |         |         |         |               |        |        |        |        |        |                        |      |                  |                |                    |
|             |        |           |         |         |         |         |         |               |        |        |        |        |        |                        |      |                  |                |                    |

**CTGF-8month**

|      |        | OD Values |         |         |         |         |         | Concentration |        |        |        |        |        | Concentration(average) | SEM  | repeat of biolog | P value vs. RT | P value vs. RT+PND |
|------|--------|-----------|---------|---------|---------|---------|---------|---------------|--------|--------|--------|--------|--------|------------------------|------|------------------|----------------|--------------------|
| Name | Group  | 1         | 2       | 3       | 4       | 5       | 6       | 1             | 2      | 3      | 4      | 5      | 6      |                        |      |                  |                |                    |
| CTGF | Normal | 0.56812   | 0.42032 | 0.49518 | 0.46105 | 0.55971 | 0.52343 | 177.82        | 122.99 | 150.76 | 138.1  | 174.7  | 161.24 | 154.27                 | 8.70 | 6                | <0.01          |                    |
|      | RT     | 1.06830   | 1.11402 | 1.11989 | 1.07903 | 1.06000 | 1.13647 | 363.37        | 380.33 | 382.51 | 367.35 | 360.29 | 388.66 | 373.75                 | 4.73 | 6                |                |                    |
|      | RT+PND | 1.05892   | 1.05938 | 0.97880 | 1.07488 | 0.98266 | 1.03843 | 359.89        | 360.06 | 330.17 | 365.81 | 331.6  | 352.29 | 349.97                 | 6.29 | 6                | <0.05          |                    |
|      | RT+CTS | 1.12674   | 1.07655 | 1.08466 | 1.00916 | 1.11237 | 1.05129 | 385.05        | 366.43 | 369.44 | 341.43 | 379.72 | 357.06 | 366.52                 | 6.44 | 6                | ns             | ns                 |
|      |        |           |         |         |         |         |         |               |        |        |        |        |        |                        |      |                  |                |                    |
|      |        |           |         |         |         |         |         |               |        |        |        |        |        |                        |      |                  |                |                    |

| NOX-4        |                 |             |             |             |      |             |             |             |      |             |             |             |      |             |             |             |      |
|--------------|-----------------|-------------|-------------|-------------|------|-------------|-------------|-------------|------|-------------|-------------|-------------|------|-------------|-------------|-------------|------|
| Time (month) |                 |             |             |             |      |             |             |             |      |             |             |             |      |             |             |             |      |
| Group        | Sign            | 1           |             |             |      | 3           |             |             |      | 5           |             |             |      | 8           |             |             |      |
|              |                 | No.1 visual | No.2 visual | No.3 visual | Mean | No.1 visual | No.2 visual | No.3 visual | Mean | No.1 visual | No.2 visual | No.3 visual | Mean | No.1 visual | No.2 visual | No.3 visual | Mean |
| Normal       | left ear        | 0           | 0           | 0           | 0    | 0           | 0           | 0           | 0    | 0           | 0           | 0           | 0    | 1           | 0           | 0           | 0.33 |
|              | right ear       | 1           | 0           | 0           | 0.33 | 0           | 0           | 0           | 0    | 0           | 1           | 0           | 0.33 | 0           | 0           | 0           | 0    |
|              | left eye        | 0           | 0           | 1           | 0.33 | 0           | 0           | 0           | 0    | 0           | 0           | 0           | 0    | 0           | 0           | 0           | 0    |
|              | right eye       | 0           | 0           | 0           | 0    | 0           | 0           | 0           | 0    | 0           | 0           | 0           | 0    | 0           | 0           | 0           | 0    |
|              | left front paw  | 0           | 0           | 0           | 0    | 0           | 0           | 0           | 0    | 0           | 0           | 0           | 0    | 0           | 0           | 0           | 0    |
|              | right front paw | 0           | 0           | 0           | 0    | 1           | 0           | 0           | 0.33 | 0           | 0           | 0           | 0    | 0           | 1           | 0           | 0.33 |
| RT           | left ear        | 4           | 6           | 4           | 4.67 | 6           | 6           | 6           | 6    | 8           | 8           | 6           | 7.33 | 9           | 9           | 9           | 9    |
|              | right ear       | 4           | 4           | 4           | 4.00 | 4           | 6           | 6           | 5.33 | 6           | 6           | 8           | 6.67 | 9           | 9           | 8           | 8.67 |
|              | left eye        | 6           | 4           | 4           | 4.67 | 6           | 6           | 6           | 6    | 8           | 6           | 8           | 7.33 | 8           | 9           | 9           | 8.67 |
|              | right eye       | 6           | 6           | 4           | 5.33 | 6           | 8           | 6           | 6.67 | 8           | 8           | 6           | 7.33 | 9           | 8           | 9           | 8.67 |
|              | left front paw  | 4           | 6           | 4           | 4.67 | 6           | 6           | 6           | 6    | 6           | 8           | 8           | 7.33 | 9           | 9           | 9           | 9    |
|              | right front paw | 4           | 4           | 6           | 4.67 | 6           | 6           | 6           | 6    | 8           | 8           | 8           | 8    | 9           | 12          | 9           | 10   |
| RT+PND       | left ear        | 3           | 3           | 2           | 2.67 | 4           | 4           | 6           | 4.67 | 6           | 4           | 4           | 4.67 | 6           | 8           | 6           | 6.67 |
|              | right ear       | 3           | 3           | 3           | 3    | 4           | 6           | 4           | 4.67 | 4           | 4           | 6           | 4.67 | 8           | 8           | 6           | 7.33 |
|              | left eye        | 2           | 2           | 2           | 2    | 3           | 3           | 4           | 3.33 | 6           | 6           | 4           | 5.33 | 8           | 8           | 8           | 8    |
|              | right eye       | 2           | 3           | 2           | 2.33 | 6           | 4           | 6           | 5.33 | 6           | 6           | 6           | 6    | 8           | 6           | 6           | 6.67 |
|              | left front paw  | 2           | 2           | 3           | 2.33 | 4           | 4           | 4           | 4    | 4           | 6           | 4           | 4.67 | 8           | 8           | 6           | 7.33 |
|              | right front paw | 2           | 2           | 2           | 2    | 4           | 4           | 3           | 3.67 | 6           | 6           | 6           | 6    | 6           | 8           | 6           | 6.67 |
| RT+CTS       | left ear        | 2           | 2           | 1           | 1.67 | 4           | 4           | 4           | 4    | 4           | 4           | 6           | 4.67 | 6           | 6           | 6           | 6    |
|              | right ear       | 2           | 3           | 2           | 2.33 | 6           | 4           | 4           | 4.67 | 6           | 4           | 6           | 5.33 | 8           | 6           | 8           | 7.33 |
|              | left eye        | 2           | 1           | 2           | 1.67 | 4           | 4           | 6           | 4.67 | 4           | 4           | 4           | 4    | 6           | 4           | 6           | 5.33 |
|              | right eye       | 2           | 2           | 2           | 2    | 4           | 6           | 4           | 4.67 | 4           | 6           | 4           | 4.67 | 4           | 6           | 6           | 5.33 |
|              | left front paw  | 3           | 2           | 3           | 2.67 | 3           | 4           | 3           | 3.33 | 6           | 4           | 4           | 4.67 | 6           | 8           | 8           | 7.33 |
|              | right front paw | 3           | 2           | 2           | 2.33 | 3           | 3           | 4           | 3.33 | 4           | 6           | 6           | 5.33 | 6           | 6           | 6           | 6    |

| COX-2        |                 |             |             |             |      |             |             |             |      |             |             |             |      |             |             |             |      |
|--------------|-----------------|-------------|-------------|-------------|------|-------------|-------------|-------------|------|-------------|-------------|-------------|------|-------------|-------------|-------------|------|
| Time (month) |                 |             |             |             |      |             |             |             |      |             |             |             |      |             |             |             |      |
| Group        | Sign            | 1           |             |             |      | 3           |             |             |      | 5           |             |             |      | 8           |             |             |      |
|              |                 | No.1 visual | No.2 visual | No.3 visual | Mean | No.1 visual | No.2 visual | No.3 visual | Mean | No.1 visual | No.2 visual | No.3 visual | Mean | No.1 visual | No.2 visual | No.3 visual | Mean |
| Normal       | left ear        | 6           | 4           | 3           | 4.33 | 3           | 3           | 4           | 3.33 | 4           | 4           | 3           | 3.67 | 4           | 6           | 4           | 4.67 |
|              | right ear       | 6           | 6           | 4           | 5.33 | 6           | 4           | 6           | 5.33 | 6           | 6           | 4           | 5.33 | 3           | 3           | 3           | 3    |
|              | left eye        | 4           | 4           | 3           | 3.67 | 4           | 4           | 3           | 3.67 | 3           | 4           | 4           | 3.67 | 6           | 6           | 4           | 5.33 |
|              | right eye       | 4           | 6           | 4           | 4.67 | 6           | 4           | 4           | 4.67 | 4           | 4           | 6           | 4.67 | 4           | 4           | 3           | 3.67 |
|              | left front paw  | 6           | 4           | 4           | 4.67 | 4           | 6           | 4           | 4.67 | 4           | 6           | 6           | 5.33 | 6           | 4           | 4           | 4.67 |
|              | right front paw | 4           | 4           | 6           | 4.67 | 4           | 4           | 4           | 4    | 3           | 4           | 4           | 3.67 | 4           | 6           | 6           | 5.33 |
| RT           | left ear        | 3           | 2           | 3           | 2.67 | 2           | 2           | 2           | 2    | 2           | 2           | 2           | 2    | 3           | 2           | 2           | 2.33 |
|              | right ear       | 4           | 4           | 3           | 3.67 | 3           | 3           | 2           | 2.67 | 2           | 2           | 3           | 2.33 | 2           | 1           | 2           | 1.67 |
|              | left eye        | 4           | 4           | 3           | 3.67 | 2           | 3           | 4           | 3    | 2           | 2           | 2           | 2    | 2           | 2           | 1           | 1.67 |
|              | right eye       | 3           | 4           | 4           | 3.67 | 3           | 3           | 2           | 2.67 | 3           | 2           | 2           | 2.33 | 3           | 2           | 2           | 2.33 |
|              | left front paw  | 2           | 2           | 4           | 2.67 | 4           | 3           | 3           | 3.33 | 2           | 3           | 2           | 2.33 | 2           | 2           | 3           | 2.33 |
|              | right front paw | 2           | 2           | 4           | 2.67 | 3           | 2           | 3           | 2.67 | 2           | 2           | 2           | 2    | 1           | 2           | 2           | 1.67 |
| RT+PND       | left ear        | 4           | 4           | 6           | 4.67 | 4           | 3           | 4           | 3.67 | 3           | 3           | 4           | 3.33 | 4           | 6           | 4           | 4.67 |
|              | right ear       | 3           | 4           | 4           | 3.67 | 4           | 4           | 4           | 4    | 4           | 4           | 6           | 4.67 | 4           | 4           | 4           | 4    |
|              | left eye        | 4           | 3           | 4           | 3.67 | 4           | 3           | 4           | 3.67 | 6           | 4           | 4           | 4.67 | 6           | 6           | 4           | 5.33 |
|              | right eye       | 6           | 4           | 6           | 5.33 | 6           | 4           | 6           | 5.33 | 4           | 6           | 4           | 4.67 | 4           | 6           | 6           | 5.33 |
|              | left front paw  | 4           | 6           | 6           | 5.33 | 4           | 6           | 4           | 4.67 | 4           | 4           | 3           | 3.67 | 6           | 4           | 4           | 4.67 |
|              | right front paw | 4           | 3           | 4           | 3.67 | 4           | 4           | 3           | 3.67 | 4           | 4           | 6           | 4.67 | 4           | 3           | 4           | 3.67 |
| RT+CTS       | left ear        | 6           | 4           | 3           | 4.33 | 3           | 2           | 3           | 2.67 | 2           | 1           | 2           | 1.67 | 2           | 2           | 2           | 2    |
|              | right ear       | 4           | 4           | 3           | 3.67 | 4           | 3           | 3           | 3.33 | 2           | 3           | 2           | 2.33 | 2           | 2           | 3           | 2.33 |
|              | left eye        | 4           | 4           | 4           | 4    | 2           | 2           | 3           | 2.33 | 2           | 2           | 3           | 2.33 | 2           | 3           | 2           | 2.33 |
|              | right eye       | 3           | 3           | 4           | 3.33 | 4           | 3           | 4           | 3.67 | 2           | 2           | 2           | 2    | 3           | 2           | 2           | 2.33 |
|              | left front paw  | 3           | 3           | 4           | 3.33 | 3           | 4           | 3           | 3.33 | 4           | 2           | 3           | 3    | 2           | 3           | 2           | 2.33 |
|              | right front paw | 3           | 3           | 3           | 3    | 3           | 2           | 3           | 2.67 | 3           | 3           | 3           | 3    | 2           | 2           | 3           | 2.33 |

| MMP-1        |                 |             |             |             |      |             |             |             |      |             |             |             |      |             |             |             |      |
|--------------|-----------------|-------------|-------------|-------------|------|-------------|-------------|-------------|------|-------------|-------------|-------------|------|-------------|-------------|-------------|------|
| Time (month) |                 |             |             |             |      |             |             |             |      |             |             |             |      |             |             |             |      |
| Group        | Sign            | 1           |             |             |      | 3           |             |             |      | 5           |             |             |      | 8           |             |             |      |
|              |                 | No.1 visual | No.2 visual | No.3 visual | Mean | No.1 visual | No.2 visual | No.3 visual | Mean | No.1 visual | No.2 visual | No.3 visual | Mean | No.1 visual | No.2 visual | No.3 visual | Mean |
| Normal       | left ear        | 3           | 3           | 4           | 3.33 | 3           | 3           | 3           | 3    | 4           | 4           | 3           | 3.67 | 4           | 3           | 3           | 3.33 |
|              | right ear       | 2           | 3           | 3           | 2.67 | 4           | 3           | 4           | 3.67 | 4           | 4           | 4           | 4    | 3           | 4           | 4           | 3.67 |
|              | left eye        | 3           | 4           | 4           | 3.67 | 4           | 4           | 4           | 4    | 3           | 3           | 2           | 2.67 | 4           | 4           | 4           | 4    |
|              | right eye       | 4           | 4           | 4           | 4    | 3           | 4           | 2           | 3    | 4           | 4           | 4           | 4    | 4           | 3           | 3           | 3.33 |
|              | left front paw  | 4           | 4           | 3           | 3.67 | 4           | 3           | 4           | 3.67 | 3           | 4           | 4           | 3.67 | 4           | 3           | 3           | 3.33 |
|              | right front paw | 3           | 3           | 4           | 3.33 | 3           | 4           | 4           | 3.67 | 4           | 3           | 3           | 3.33 | 3           | 3           | 4           | 3.33 |
| RT           | left ear        | 3           | 2           | 2           | 2.33 | 2           | 3           | 2           | 2.33 | 3           | 2           | 2           | 2.33 | 2           | 2           | 1           | 1.67 |
|              | right ear       | 2           | 3           | 3           | 2.67 | 2           | 2           | 3           | 2.33 | 2           | 1           | 2           | 1.67 | 2           | 1           | 2           | 1.67 |
|              | left eye        | 2           | 3           | 3           | 2.67 | 3           | 3           | 2           | 2.67 | 2           | 2           | 2           | 2    | 1           | 1           | 2           | 1.33 |
|              | right eye       | 2           | 3           | 2           | 2.33 | 2           | 3           | 2           | 2.33 | 2           | 2           | 1           | 1.67 | 1           | 2           | 2           | 1.67 |
|              | left front paw  | 3           | 2           | 3           | 2.67 | 2           | 2           | 3           | 2.33 | 2           | 2           | 2           | 2    | 2           | 2           | 1           | 1.67 |
|              | right front paw | 3           | 3           | 2           | 2.67 | 2           | 2           | 2           | 2    | 2           | 3           | 2           | 2.33 | 1           | 2           | 2           | 1.67 |
| RT+PND       | left ear        | 2           | 2           | 3           | 2.33 | 3           | 2           | 3           | 2.67 | 2           | 2           | 3           | 2.33 | 3           | 3           | 3           | 3    |
|              | right ear       | 3           | 3           | 3           | 3    | 3           | 3           | 4           | 3.33 | 3           | 3           | 4           | 3.33 | 4           | 3           | 3           | 3.33 |
|              | left eye        | 3           | 2           | 3           | 2.67 | 2           | 3           | 3           | 2.67 | 2           | 3           | 3           | 2.67 | 3           | 3           | 4           | 3.33 |
|              | right eye       | 3           | 3           | 2           | 2.67 | 3           | 2           | 3           | 2.67 | 4           | 3           | 3           | 3.33 | 2           | 3           | 3           | 2.67 |
|              | left front paw  | 3           | 2           | 3           | 2.67 | 4           | 3           | 3           | 3.33 | 3           | 4           | 3           | 3.33 | 3           | 4           | 3           | 3.33 |
|              | right front paw | 3           | 3           | 3           | 3    | 3           | 3           | 3           | 3    | 3           | 3           | 2           | 2.67 | 4           | 3           | 3           | 3.33 |
| RT+CTS       | left ear        | 3           | 2           | 3           | 2.67 | 3           | 4           | 3           | 3.33 | 3           | 3           | 3           | 3    | 4           | 4           | 3           | 3.67 |
|              | right ear       | 3           | 3           | 3           | 3    | 3           | 3           | 3           | 3    | 4           | 4           | 3           | 3.67 | 3           | 3           | 4           | 3.33 |
|              | left eye        | 2           | 3           | 2           | 2.33 | 3           | 2           | 3           | 2.67 | 3           | 3           | 4           | 3.33 | 3           | 4           | 4           | 3.67 |
|              | right eye       | 3           | 2           | 3           | 2.67 | 2           | 3           | 3           | 2.67 | 4           | 3           | 3           | 3.33 | 4           | 4           | 4           | 4    |
|              | left front paw  | 3           | 3           | 3           | 3    | 4           | 3           | 3           | 3.33 | 3           | 4           | 4           | 3.67 | 3           | 4           | 4           | 3.67 |
|              | right front paw | 2           | 3           | 2           | 2.33 | 3           | 3           | 4           | 3.33 | 4           | 4           | 3           | 3.67 | 4           | 3           | 4           | 3.67 |

**IL-6 1month**

| IL-6 1month |        |           |         |         |         |         |         |               |       |       |       |       |       |                      |      |                  |                |                |
|-------------|--------|-----------|---------|---------|---------|---------|---------|---------------|-------|-------|-------|-------|-------|----------------------|------|------------------|----------------|----------------|
|             |        | OD Values |         |         |         |         |         | Concentration |       |       |       |       |       | concentration(averag | SEM  | repeat of biolog | P value vs. RT | value vs. RT+P |
| Name        | Group  | 1         | 2       | 3       | 4       | 5       | 6       | 1             | 2     | 3     | 4     | 5     | 6     |                      |      |                  |                |                |
| IL-6        | Normal | 0.15713   | 0.14935 | 0.13670 | 0.14095 | 0.14241 | 0.14151 | 25.64         | 22.76 | 18.08 | 19.65 | 20.19 | 19.86 | 21.03                | 1.11 | 6                | <0.01          |                |
|             | RT     | 0.20346   | 0.20416 | 0.19573 | 0.19819 | 0.20062 | 0.21068 | 42.78         | 43.04 | 39.92 | 40.83 | 41.73 | 45.45 | 42.29                | 0.79 | 6                |                |                |
|             | RT+PND | 0.19316   | 0.19376 | 0.19638 | 0.18659 | 0.17254 | 0.17070 | 38.97         | 39.19 | 40.16 | 36.54 | 31.34 | 30.66 | 36.14                | 1.70 | 6                | <0.01          |                |
|             | RT+CTS | 0.19565   | 0.19078 | 0.20786 | 0.19895 | 0.18930 | 0.20143 | 39.89         | 38.09 | 44.41 | 41.11 | 37.54 | 42.03 | 40.51                | 1.05 | 6                | ns             | <0.05          |
|             |        |           |         |         |         |         |         |               |       |       |       |       |       |                      |      |                  |                |                |
|             |        |           |         |         |         |         |         |               |       |       |       |       |       |                      |      |                  |                |                |

**IL-6 3month**

| IL-6 3month |        |           |         |         |         |         |         |               |       |       |       |       |       |                      |      |                  |                |                |
|-------------|--------|-----------|---------|---------|---------|---------|---------|---------------|-------|-------|-------|-------|-------|----------------------|------|------------------|----------------|----------------|
|             |        | OD Values |         |         |         |         |         | Concentration |       |       |       |       |       | concentration(averag | SEM  | repeat of biolog | P value vs. RT | value vs. RT+P |
| Name        | Group  | 1         | 2       | 3       | 4       | 5       | 6       | 1             | 2     | 3     | 4     | 5     | 6     |                      |      |                  |                |                |
| IL-6        | Normal | 0.13732   | 0.14538 | 0.13857 | 0.14665 | 0.13970 | 0.15076 | 18.31         | 21.29 | 18.77 | 21.76 | 19.19 | 23.28 | 20.43                | 0.80 | 6                | <0.01          |                |
|             | RT     | 0.24584   | 0.25597 | 0.26162 | 0.24281 | 0.26376 | 0.24762 | 58.46         | 62.21 | 64.3  | 57.34 | 65.09 | 59.12 | 61.09                | 1.32 | 6                |                |                |
|             | RT+PND | 0.20141   | 0.20843 | 0.21200 | 0.19122 | 0.19224 | 0.19695 | 42.02         | 44.62 | 45.94 | 38.25 | 38.63 | 40.37 | 41.64                | 1.29 | 6                | <0.01          |                |
|             | RT+CTS | 0.23365   | 0.22259 | 0.23673 | 0.24138 | 0.21797 | 0.22141 | 53.95         | 49.86 | 55.09 | 56.81 | 48.15 | 49.42 | 52.21                | 1.44 | 6                | <0.01          | <0.01          |
|             |        |           |         |         |         |         |         |               |       |       |       |       |       |                      |      |                  |                |                |
|             |        |           |         |         |         |         |         |               |       |       |       |       |       |                      |      |                  |                |                |



**IL-6 5month**

|      |        | OD Values |         |         |         |         |         | Concentration |       |       |       |       |       | concentration(averag | SEM  | repeat of biolog | P value vs. RT | value vs. RT+P |
|------|--------|-----------|---------|---------|---------|---------|---------|---------------|-------|-------|-------|-------|-------|----------------------|------|------------------|----------------|----------------|
| Name | Group  | 1         | 2       | 3       | 4       | 5       | 6       | 1             | 2     | 3     | 4     | 5     | 6     |                      |      |                  |                |                |
| IL-6 | Normal | 0.15019   | 0.14319 | 0.13803 | 0.15578 | 0.14143 | 0.14530 | 23.07         | 20.48 | 18.57 | 25.14 | 19.83 | 21.26 | 21.39                | 0.97 | 6                | <0.01          |                |
|      | RT     | 0.26608   | 0.28654 | 0.27659 | 0.26930 | 0.28349 | 0.26708 | 65.95         | 73.52 | 69.84 | 67.14 | 72.39 | 66.32 | 69.19                | 1.32 | 6                |                |                |
|      | RT+PND | 0.23989   | 0.23176 | 0.23857 | 0.21978 | 0.21178 | 0.21857 | 56.26         | 53.25 | 55.77 | 48.82 | 45.86 | 48.37 | 51.39                | 1.76 | 6                | <0.01          |                |
|      | RT+CTS | 0.24603   | 0.24170 | 0.25127 | 0.26005 | 0.22935 | 0.22857 | 58.53         | 56.93 | 60.47 | 63.72 | 52.36 | 52.07 | 57.35                | 1.87 | 6                | <0.01          | <0.05          |
|      |        |           |         |         |         |         |         |               |       |       |       |       |       |                      |      |                  |                |                |
|      |        |           |         |         |         |         |         |               |       |       |       |       |       |                      |      |                  |                |                |

**IL-6 8month**

| IL-6 8month |        |           |         |         |         |         |         |               |       |       |       |       |       |                      |      |                  |                |                |
|-------------|--------|-----------|---------|---------|---------|---------|---------|---------------|-------|-------|-------|-------|-------|----------------------|------|------------------|----------------|----------------|
|             |        | OD Values |         |         |         |         |         | Concentration |       |       |       |       |       | concentration(averag | SEM  | repeat of biolog | P value vs. RT | value vs. RT+P |
| Name        | Group  | 1         | 2       | 3       | 4       | 5       | 6       | 1             | 2     | 3     | 4     | 5     | 6     |                      |      |                  |                |                |
| IL-6        | Normal | 0.14341   | 0.14095 | 0.14284 | 0.15176 | 0.14565 | 0.14059 | 20.56         | 19.65 | 20.35 | 23.65 | 21.39 | 19.52 | 20.85                | 0.62 | 6                | <0.01          |                |
|             | RT     | 0.27227   | 0.29084 | 0.28741 | 0.27824 | 0.29816 | 0.27441 | 68.24         | 75.11 | 73.84 | 70.45 | 77.82 | 69.03 | 72.42                | 1.54 | 6                |                |                |
|             | RT+PND | 0.25170   | 0.24341 | 0.24724 | 0.23395 | 0.22978 | 0.24457 | 60.63         | 57.56 | 58.98 | 54.06 | 52.52 | 57.99 | 56.96                | 1.25 | 6                | <0.01          |                |
|             | RT+CTS | 0.25100   | 0.25005 | 0.25986 | 0.27470 | 0.24124 | 0.23678 | 60.37         | 60.02 | 63.65 | 69.14 | 56.76 | 55.11 | 60.84                | 2.06 | 6                | <0.01          | ns             |
|             |        |           |         |         |         |         |         |               |       |       |       |       |       |                      |      |                  |                |                |
|             |        |           |         |         |         |         |         |               |       |       |       |       |       |                      |      |                  |                |                |

**IL-10 1month**

| Name  | Group  | OD Values |         |         |         |         |         | Concentration |       |       |       |       |       | Concentration(average) | SEM  | Repeat of biological | P value vs. RT | P value vs. RT+PND |
|-------|--------|-----------|---------|---------|---------|---------|---------|---------------|-------|-------|-------|-------|-------|------------------------|------|----------------------|----------------|--------------------|
|       |        | 1         | 2       | 3       | 4       | 5       | 6       | 1             | 2     | 3     | 4     | 5     | 6     |                        |      |                      |                |                    |
| IL-10 | Normal | 0.20227   | 0.19430 | 0.19916 | 0.19197 | 0.20451 | 0.19170 | 42.26         | 39.31 | 41.11 | 38.45 | 43.09 | 38.35 | 40.43                  | 0.82 | 6                    | <0.01          |                    |
|       | RT     | 0.24492   | 0.23451 | 0.25486 | 0.23416 | 0.22854 | 0.24648 | 58.04         | 54.19 | 61.72 | 54.06 | 51.98 | 58.62 | 56.44                  | 1.48 | 6                    |                |                    |
|       | RT+PND | 0.22089   | 0.22432 | 0.21186 | 0.22873 | 0.19719 | 0.19802 | 49.15         | 50.42 | 45.81 | 52.05 | 40.38 | 40.69 | 46.42                  | 2.04 | 6                    | <0.01          |                    |
|       | RT+CTS | 0.21892   | 0.23624 | 0.21573 | 0.22073 | 0.24321 | 0.23189 | 48.42         | 54.83 | 47.24 | 49.09 | 57.41 | 53.22 | 51.70                  | 1.66 | 6                    | <0.05          | <0.05              |
|       |        |           |         |         |         |         |         |               |       |       |       |       |       |                        |      |                      |                |                    |
|       |        |           |         |         |         |         |         |               |       |       |       |       |       |                        |      |                      |                |                    |

| IL-10 3month |        |           |         |         |         |         |         |               |       |       |       |       |       |                        |      |                  |                |                    |
|--------------|--------|-----------|---------|---------|---------|---------|---------|---------------|-------|-------|-------|-------|-------|------------------------|------|------------------|----------------|--------------------|
|              |        | OD Values |         |         |         |         |         | Concentration |       |       |       |       |       | Concentration(average) | SEM  | repeat of biolog | P value vs. RT | P value vs. RT+PND |
| Name         | Group  | 1         | 2       | 3       | 4       | 5       | 6       | 1             | 2     | 3     | 4     | 5     | 6     |                        |      |                  |                |                    |
| IL-10        | Normal | 0.20154   | 0.19631 | 0.19957 | 0.18845 | 0.19320 | 0.20367 | 42.09         | 40.15 | 41.36 | 37.24 | 39    | 42.88 | 40.45                  | 0.85 | 6                | <0.01          |                    |
|              | RT     | 0.28203   | 0.25220 | 0.28575 | 0.25841 | 0.25045 | 0.28138 | 71.91         | 60.86 | 73.29 | 63.16 | 60.21 | 71.67 | 66.85                  | 2.48 | 6                |                |                    |
|              | RT+PND | 0.22729   | 0.24181 | 0.22014 | 0.23647 | 0.20818 | 0.21193 | 51.63         | 57.01 | 48.98 | 55.03 | 44.55 | 45.94 | 50.52                  | 2.02 | 6                | <0.01          |                    |
|              | RT+CTS | 0.23690   | 0.25323 | 0.23930 | 0.24338 | 0.26235 | 0.25185 | 55.19         | 61.24 | 56.08 | 57.59 | 64.62 | 60.73 | 59.24                  | 1.46 | 6                | ns             | <0.05              |
|              |        |           |         |         |         |         |         |               |       |       |       |       |       |                        |      |                  |                |                    |
|              |        |           |         |         |         |         |         |               |       |       |       |       |       |                        |      |                  |                |                    |

| IL-10 5month |        |           |         |         |         |         |         |               |       |       |       |       |       |                        |      |                      |                |                    |
|--------------|--------|-----------|---------|---------|---------|---------|---------|---------------|-------|-------|-------|-------|-------|------------------------|------|----------------------|----------------|--------------------|
| Name         | Group  | OD Values |         |         |         |         |         | Concentration |       |       |       |       |       | Concentration(average) | SEM  | Repeat of biological | P value vs. RT | P value vs. RT+PND |
|              |        | 1         | 2       | 3       | 4       | 5       | 6       | 1             | 2     | 3     | 4     | 5     | 6     |                        |      |                      |                |                    |
| IL-10        | Normal | 0.20089   | 0.20205 | 0.19474 | 0.19736 | 0.19798 | 0.20764 | 41.85         | 42.28 | 39.57 | 40.54 | 40.77 | 44.35 | 41.56                  | 0.68 | 6                    | <0.01          |                    |
|              | RT     | 0.30648   | 0.27428 | 0.31042 | 0.29140 | 0.27752 | 0.29323 | 80.97         | 69.04 | 82.43 | 75.38 | 70.24 | 76.06 | 75.69                  | 2.22 | 6                    |                |                    |
|              | RT+PND | 0.24886   | 0.26516 | 0.24200 | 0.25050 | 0.22872 | 0.24532 | 59.62         | 65.66 | 57.08 | 60.23 | 52.16 | 58.31 | 58.84                  | 1.80 | 6                    | <0.01          |                    |
|              | RT+CTS | 0.27447   | 0.26813 | 0.25577 | 0.25558 | 0.27696 | 0.27393 | 69.11         | 66.76 | 62.18 | 62.11 | 70.03 | 68.91 | 66.52                  | 1.45 | 6                    | <0.01          | <0.01              |
|              |        |           |         |         |         |         |         |               |       |       |       |       |       |                        |      |                      |                |                    |
|              |        |           |         |         |         |         |         |               |       |       |       |       |       |                        |      |                      |                |                    |

| IL-10 8month |        |           |         |         |         |         |         |               |       |       |       |       |       |                        |      |                  |                |                    |
|--------------|--------|-----------|---------|---------|---------|---------|---------|---------------|-------|-------|-------|-------|-------|------------------------|------|------------------|----------------|--------------------|
|              |        | OD Values |         |         |         |         |         | Concentration |       |       |       |       |       | Concentration(average) | SEM  | repeat of biolog | P value vs. RT | P value vs. RT+PND |
| Name         | Group  | 1         | 2       | 3       | 4       | 5       | 6       | 1             | 2     | 3     | 4     | 5     | 6     |                        |      |                  |                |                    |
| IL-10        | Normal | 0.19274   | 0.19371 | 0.20135 | 0.20071 | 0.20357 | 0.19442 | 38.83         | 39.19 | 42.02 | 41.78 | 42.84 | 39.45 | 40.69                  | 0.70 | 6                | <0.01          |                    |
|              | RT     | 0.31947   | 0.29204 | 0.35051 | 0.32970 | 0.29906 | 0.32640 | 85.78         | 75.62 | 97.28 | 89.57 | 78.22 | 88.35 | 85.80                  | 3.23 | 6                |                |                    |
|              | RT+PND | 0.26230   | 0.28853 | 0.25776 | 0.26386 | 0.24837 | 0.25803 | 64.6          | 74.32 | 62.92 | 65.18 | 59.44 | 63.02 | 64.91                  | 2.05 | 6                | <0.01          |                    |
|              | RT+CTS | 0.29207   | 0.29315 | 0.27196 | 0.27288 | 0.29914 | 0.28494 | 75.63         | 76.03 | 68.18 | 68.52 | 78.25 | 72.99 | 73.27                  | 1.70 | 6                | <0.01          | <0.05              |
|              |        |           |         |         |         |         |         |               |       |       |       |       |       |                        |      |                  |                |                    |
|              |        |           |         |         |         |         |         |               |       |       |       |       |       |                        |      |                  |                |                    |

## CCL3 IHC

Time (month)

|        |                 | 1           |             |             |      | 3           |             |             |      | 5           |             |             |      | 8           |             |             |      |
|--------|-----------------|-------------|-------------|-------------|------|-------------|-------------|-------------|------|-------------|-------------|-------------|------|-------------|-------------|-------------|------|
| Group  | Sign            | No.1 visual | No.2 visual | No.3 visual | Mean | No.1 visual | No.2 visual | No.3 visual | Mean | No.1 visual | No.2 visual | No.3 visual | Mean | No.1 visual | No.2 visual | No.3 visual | Mean |
| Normal | left ear        | 1           | 1           | 1           | 1    | 0           | 1           | 1           | 0.67 | 1           | 1           | 1           | 1    | 1           | 0           | 1           | 0.67 |
|        | right ear       | 1           | 1           | 0           | 0.67 | 1           | 1           | 1           | 1    | 1           | 1           | 1           | 1    | 1           | 1           | 1           | 1    |
|        | left eye        | 1           | 1           | 1           | 1    | 1           | 0           | 1           | 0.67 | 0           | 1           | 1           | 0.67 | 0           | 1           | 0           | 0.33 |
|        | right eye       | 1           | 1           | 1           | 1    | 0           | 1           | 0           | 0.33 | 1           | 1           | 1           | 1    | 1           | 1           | 1           | 1    |
|        | left front paw  | 0           | 1           | 1           | 0.67 | 1           | 1           | 1           | 1    | 1           | 1           | 1           | 1    | 1           | 1           | 1           | 1    |
|        | right front paw | 1           | 1           | 1           | 1    | 1           | 1           | 1           | 1    | 1           | 1           | 1           | 1    | 1           | 1           | 1           | 1    |
| RT     | left ear        | 3           | 6           | 4           | 4.33 | 6           | 4           | 6           | 5.33 | 6           | 8           | 9           | 7.67 | 12          | 9           | 12          | 11   |
|        | right ear       | 4           | 3           | 3           | 3.33 | 8           | 4           | 4           | 5.33 | 8           | 9           | 8           | 8.33 | 12          | 12          | 12          | 12   |
|        | left eye        | 4           | 6           | 4           | 4.67 | 6           | 8           | 8           | 7.33 | 9           | 9           | 9           | 9    | 9           | 9           | 12          | 10   |
|        | right eye       | 4           | 4           | 6           | 4.67 | 6           | 4           | 8           | 6    | 12          | 9           | 12          | 11   | 12          | 12          | 9           | 11   |
|        | left front paw  | 6           | 6           | 4           | 5.33 | 8           | 8           | 6           | 7.33 | 8           | 6           | 9           | 7.67 | 12          | 12          | 12          | 12   |
|        | right front paw | 4           | 3           | 6           | 4.33 | 4           | 6           | 6           | 5.33 | 12          | 8           | 9           | 9.67 | 9           | 12          | 9           | 10   |
| RT+PND | left ear        | 3           | 2           | 2           | 2.33 | 4           | 3           | 4           | 3.67 | 8           | 6           | 6           | 6.67 | 9           | 8           | 6           | 7.67 |
|        | right ear       | 4           | 4           | 3           | 3.67 | 2           | 4           | 4           | 3.33 | 4           | 3           | 6           | 4.33 | 8           | 9           | 8           | 8.33 |
|        | left eye        | 2           | 3           | 2           | 2.33 | 6           | 2           | 4           | 4    | 6           | 8           | 8           | 7.33 | 6           | 6           | 8           | 6.67 |
|        | right eye       | 3           | 3           | 4           | 3.33 | 3           | 6           | 4           | 4.33 | 3           | 4           | 6           | 4.33 | 6           | 6           | 9           | 7    |
|        | left front paw  | 3           | 4           | 4           | 3.67 | 4           | 3           | 6           | 4.33 | 6           | 8           | 6           | 6.67 | 8           | 8           | 9           | 8.33 |
|        | right front paw | 4           | 2           | 2           | 2.67 | 6           | 4           | 4           | 4.67 | 6           | 4           | 4           | 4.67 | 9           | 6           | 6           | 7    |
| RT+CTS | left ear        | 3           | 4           | 3           | 3.33 | 6           | 4           | 3           | 4.33 | 4           | 4           | 6           | 4.67 | 8           | 9           | 9           | 8.67 |
|        | right ear       | 2           | 2           | 4           | 2.67 | 6           | 3           | 6           | 5    | 6           | 8           | 6           | 6.67 | 6           | 4           | 8           | 6    |
|        | left eye        | 4           | 3           | 3           | 3.33 | 4           | 6           | 4           | 4.67 | 4           | 6           | 4           | 4.67 | 4           | 6           | 6           | 5.33 |
|        | right eye       | 4           | 3           | 3           | 3.33 | 4           | 2           | 4           | 3.33 | 6           | 6           | 8           | 6.67 | 6           | 6           | 4           | 5.33 |
|        | left front paw  | 3           | 3           | 4           | 3.33 | 4           | 3           | 3           | 3.33 | 6           | 4           | 6           | 5.33 | 8           | 6           | 9           | 7.67 |
|        | right front paw | 4           | 3           | 2           | 3    | 6           | 4           | 4           | 4.67 | 6           | 4           | 4           | 4.67 | 6           | 8           | 8           | 7.33 |

## CCR1 IHC

### Time (month)

|        |                 | 1           |             |             |      | 3           |             |             |      | 5           |             |             |      | 8           |             |             |      |
|--------|-----------------|-------------|-------------|-------------|------|-------------|-------------|-------------|------|-------------|-------------|-------------|------|-------------|-------------|-------------|------|
| Group  | Sign            | No.1 visual | No.2 visual | No.3 visual | Mean | No.1 visual | No.2 visual | No.3 visual | Mean | No.1 visual | No.2 visual | No.3 visual | Mean | No.1 visual | No.2 visual | No.3 visual | Mean |
| Normal | left ear        | 1           | 1           | 0           | 0.67 | 0           | 1           | 0           | 0.33 | 1           | 0           | 1           | 0.67 | 1           | 1           | 1           | 1    |
|        | right ear       | 1           | 1           | 1           | 1    | 1           | 1           | 1           | 1    | 1           | 0           | 0           | 0.33 | 1           | 1           | 0           | 0.67 |
|        | left eye        | 1           | 0           | 1           | 0.67 | 0           | 1           | 1           | 0.67 | 0           | 1           | 1           | 0.67 | 1           | 1           | 1           | 1    |
|        | right eye       | 0           | 1           | 0           | 0.33 | 1           | 1           | 0           | 0.67 | 1           | 1           | 1           | 1    | 0           | 1           | 0           | 0.33 |
|        | left front paw  | 1           | 1           | 1           | 1    | 0           | 1           | 1           | 0.67 | 1           | 0           | 1           | 0.67 | 1           | 1           | 1           | 1    |
|        | right front paw | 0           | 1           | 1           | 0.67 | 1           | 0           | 0           | 0.33 | 0           | 1           | 1           | 0.67 | 1           | 0           | 1           | 0.67 |
| RT     | left ear        | 3           | 2           | 6           | 3.67 | 8           | 6           | 6           | 6.67 | 9           | 8           | 9           | 8.67 | 12          | 12          | 12          | 12   |
|        | right ear       | 2           | 2           | 4           | 2.67 | 6           | 4           | 6           | 5.33 | 9           | 9           | 9           | 9    | 12          | 9           | 12          | 11   |
|        | left eye        | 4           | 2           | 4           | 3.33 | 6           | 4           | 8           | 6    | 8           | 8           | 8           | 8    | 8           | 9           | 12          | 9.67 |
|        | right eye       | 4           | 2           | 2           | 2.67 | 6           | 4           | 4           | 4.67 | 9           | 8           | 9           | 8.67 | 12          | 12          | 12          | 12   |
|        | left front paw  | 4           | 2           | 4           | 3.33 | 8           | 6           | 6           | 6.67 | 9           | 12          | 9           | 10   | 12          | 12          | 9           | 11   |
|        | right front paw | 2           | 3           | 6           | 3.67 | 4           | 4           | 8           | 5.33 | 9           | 9           | 9           | 9    | 12          | 12          | 12          | 12   |
| RT+PND | left ear        | 3           | 2           | 2           | 2.33 | 6           | 4           | 4           | 4.67 | 9           | 6           | 8           | 7.67 | 9           | 9           | 8           | 8.67 |
|        | right ear       | 4           | 3           | 4           | 3.67 | 4           | 6           | 6           | 5.33 | 8           | 8           | 8           | 8    | 8           | 8           | 9           | 8.33 |
|        | left eye        | 2           | 2           | 2           | 2    | 4           | 3           | 3           | 3.33 | 8           | 6           | 9           | 7.67 | 12          | 9           | 9           | 10   |
|        | right eye       | 2           | 3           | 2           | 2.33 | 6           | 4           | 4           | 4.67 | 9           | 9           | 8           | 8.67 | 9           | 9           | 8           | 8.67 |
|        | left front paw  | 3           | 2           | 3           | 2.67 | 4           | 4           | 6           | 4.67 | 8           | 8           | 6           | 7.33 | 9           | 8           | 9           | 8.67 |
|        | right front paw | 2           | 3           | 2           | 2.33 | 4           | 6           | 4           | 4.67 | 9           | 8           | 8           | 8.33 | 8           | 6           | 9           | 7.67 |
| RT+CTS | left ear        | 2           | 2           | 3           | 2.33 | 4           | 6           | 6           | 5.33 | 6           | 6           | 8           | 6.67 | 12          | 9           | 9           | 10   |
|        | right ear       | 2           | 3           | 2           | 2.33 | 6           | 4           | 4           | 4.67 | 6           | 4           | 8           | 6    | 8           | 6           | 8           | 7.33 |
|        | left eye        | 2           | 3           | 3           | 2.67 | 6           | 3           | 4           | 4.33 | 8           | 6           | 8           | 7.33 | 8           | 8           | 9           | 8.33 |
|        | right eye       | 3           | 3           | 3           | 3    | 6           | 6           | 8           | 6.67 | 8           | 8           | 9           | 8.33 | 8           | 8           | 8           | 8    |
|        | left front paw  | 3           | 2           | 2           | 2.33 | 4           | 4           | 6           | 4.67 | 8           | 8           | 8           | 8    | 6           | 4           | 6           | 5.33 |
|        | right front paw | 3           | 3           | 3           | 3    | 4           | 4           | 6           | 4.67 | 8           | 6           | 8           | 7.33 | 9           | 12          | 8           | 9.67 |
